# Supplementary material
Source: HighWire-hosted journal article supplement (http://www.qdcxjkg.com/highwire/filestream/113622/field_highwire_adjunct_files/0/Supplementary_material.pdf)
Supplement: Supplementary_material.pdf [file Supplementary_material.pdf]

**Optional additional table (website)** Quality assessment based on the Delphi List [36]. Items of the Delphi List were scored “yes”, “no” or “don't know”. Only items that were assessed with “yes” were given a score of 1 point. A total score for overall methodological quality of maximum 9 points was obtained by applying equal weights to all items. “?” denotes unclear, + denotes yes, – denotes no.

| Author                | Randomization method | Concealment treatment allocation | Similarity groups at baseline | Eligibility criteria specified | Blinding outcome assessor | Blinding care provider | Blinding patient | Outcome: point estimates and measures of variability | Intention to treat analysis | Total score |
|-----------------------|----------------------|----------------------------------|-------------------------------|--------------------------------|---------------------------|------------------------|------------------|------------------------------------------------------|-----------------------------|-------------|
| Wagena [25]           | +                    | +                                | +                             | +                              | +                         | +                      | +                | +                                                    | +                           | 9           |
| Tønnesen [9]          | +                    | ?                                | +                             | +                              | ?                         | -                      | -                | +                                                    | +                           | 5           |
| Christenhusz [43, 44] | +                    | ?                                | -                             | +                              | ?                         | -                      | -                | +                                                    | -                           | 3           |
| Wilson [37]           | +                    | ?                                | +                             | +                              | ?                         | -                      | -                | -                                                    | +                           | 4           |
| Borglykke [45]        | +                    | -                                | +                             | +                              | ?                         | -                      | ?                | +                                                    | +                           | 5           |
| Kotz [39]             | +                    | +                                | +                             | +                              | ?                         | ?                      | +                | +                                                    | +                           | 7           |
| Tashkin [38]          | +                    | ?                                | +                             | +                              | ?                         | ?                      | +                | +                                                    | +                           | 6           |
| Hilberink [41, 42]    | +                    | ?                                | -                             | +                              | ?                         | -                      | -                | +                                                    | +                           | 4           |
